# Supplementary material
Source: PubMed Central journal article supplement (PMC4091420)
Supplement: psb-8-e26998-s01.pdf [file psb-8-e26998-s01.pdf]

## **Supplemental Material to:**

**Benajmín Ayil-Gutiérrez, Rosa Galaz-Ávalos, Eduardo Peña-Cabrera, and Victor Loyola-Vargas\***

**Dynamics of the concentration of IAA and some of its conjugates during the induction of somatic embryogenesis in *Coffea canephora***

**Plant Signaling & Behavior 2013; 9(1)  
<http://dx.doi.org/10.4161/psb.26998>**

**[www.landesbioscience.com/journals/psb/article/26998](http://www.landesbioscience.com/journals/psb/article/26998)**

**A**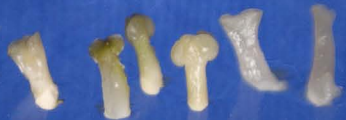

0.5 cm

**B**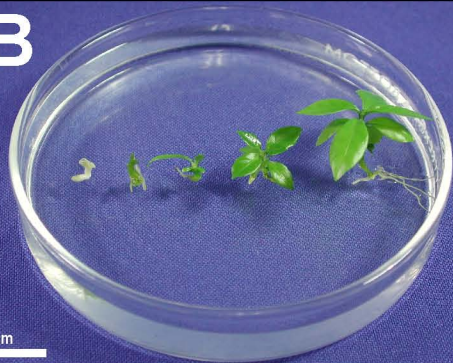

1 cm

**C**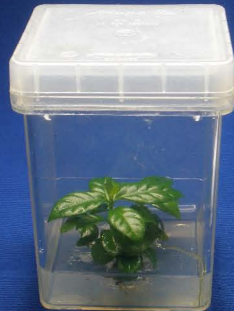

2 cm

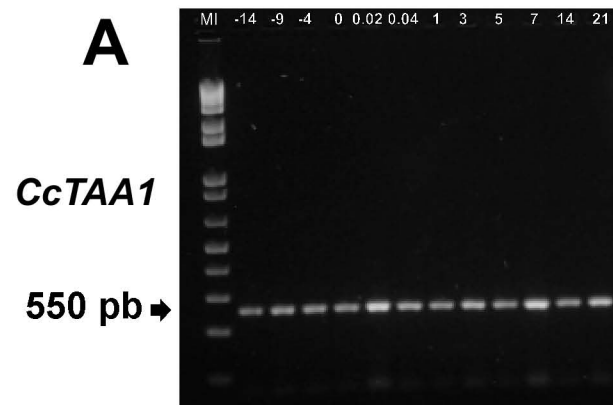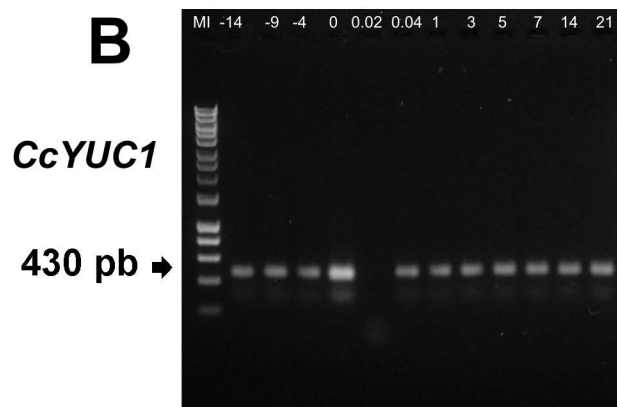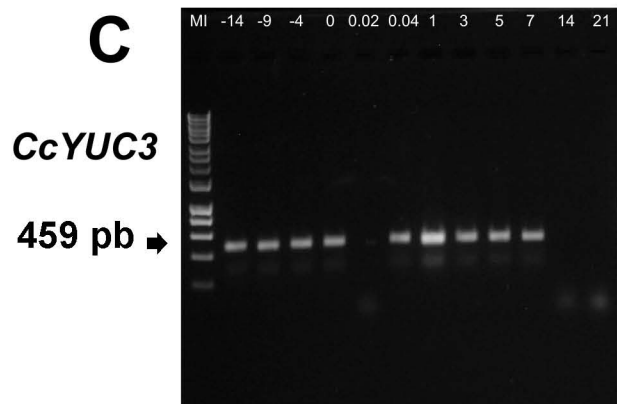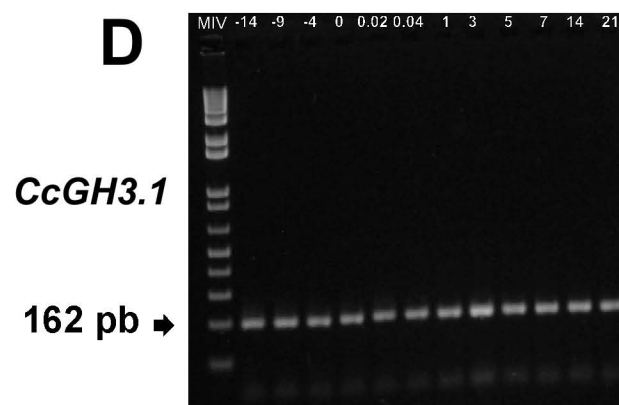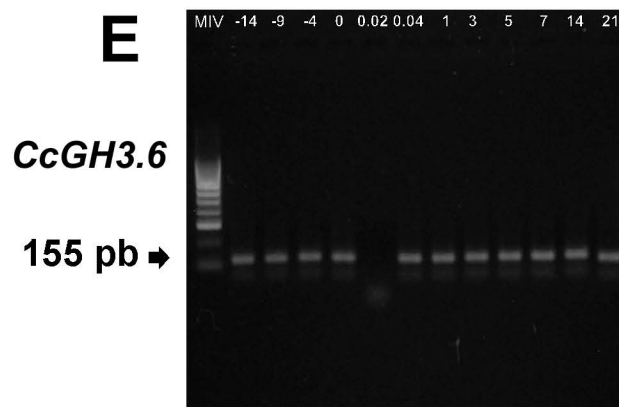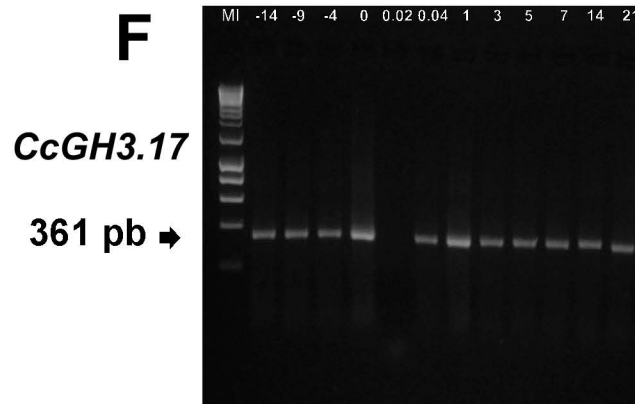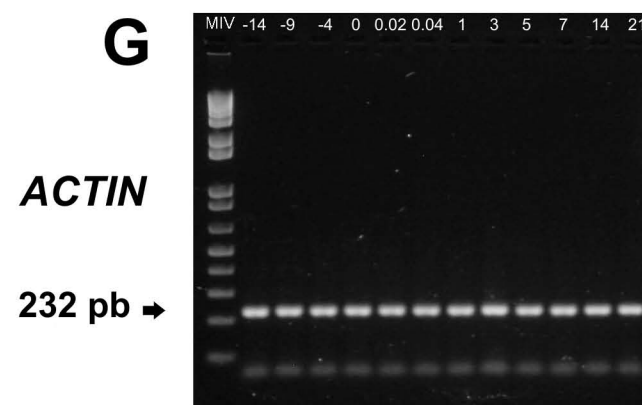

LU

26

24

22

20

18

16

14

12

10

0

1

2

3

4

5

6

7

8

9

min

3.909 IAA-Glu

4.352 IAA-Ala

5.143 IAA

6.278 IBA

7.510 NAA

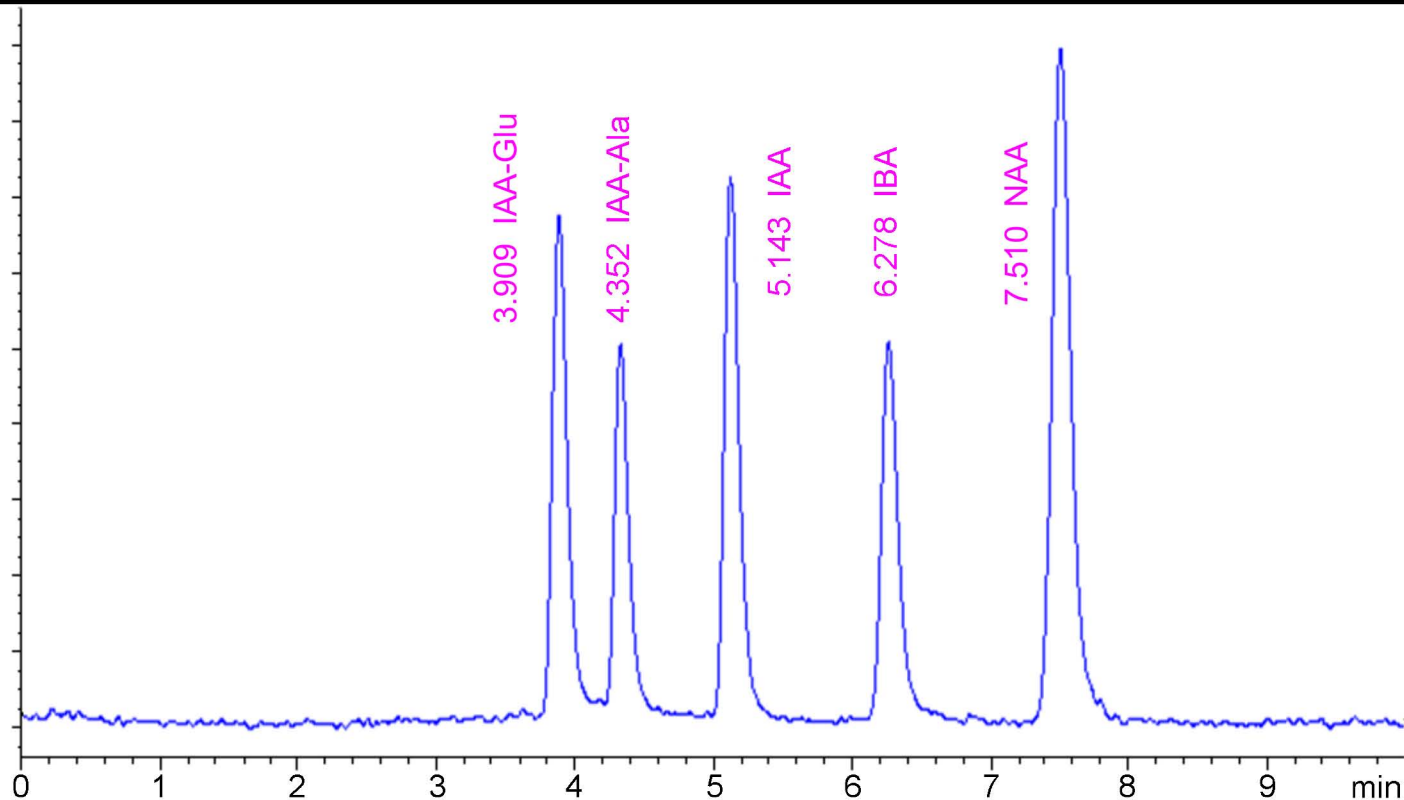

Abundance

Scan 2705 (15.391 min): INDOL ACETIC ACID (2).D\data.ms

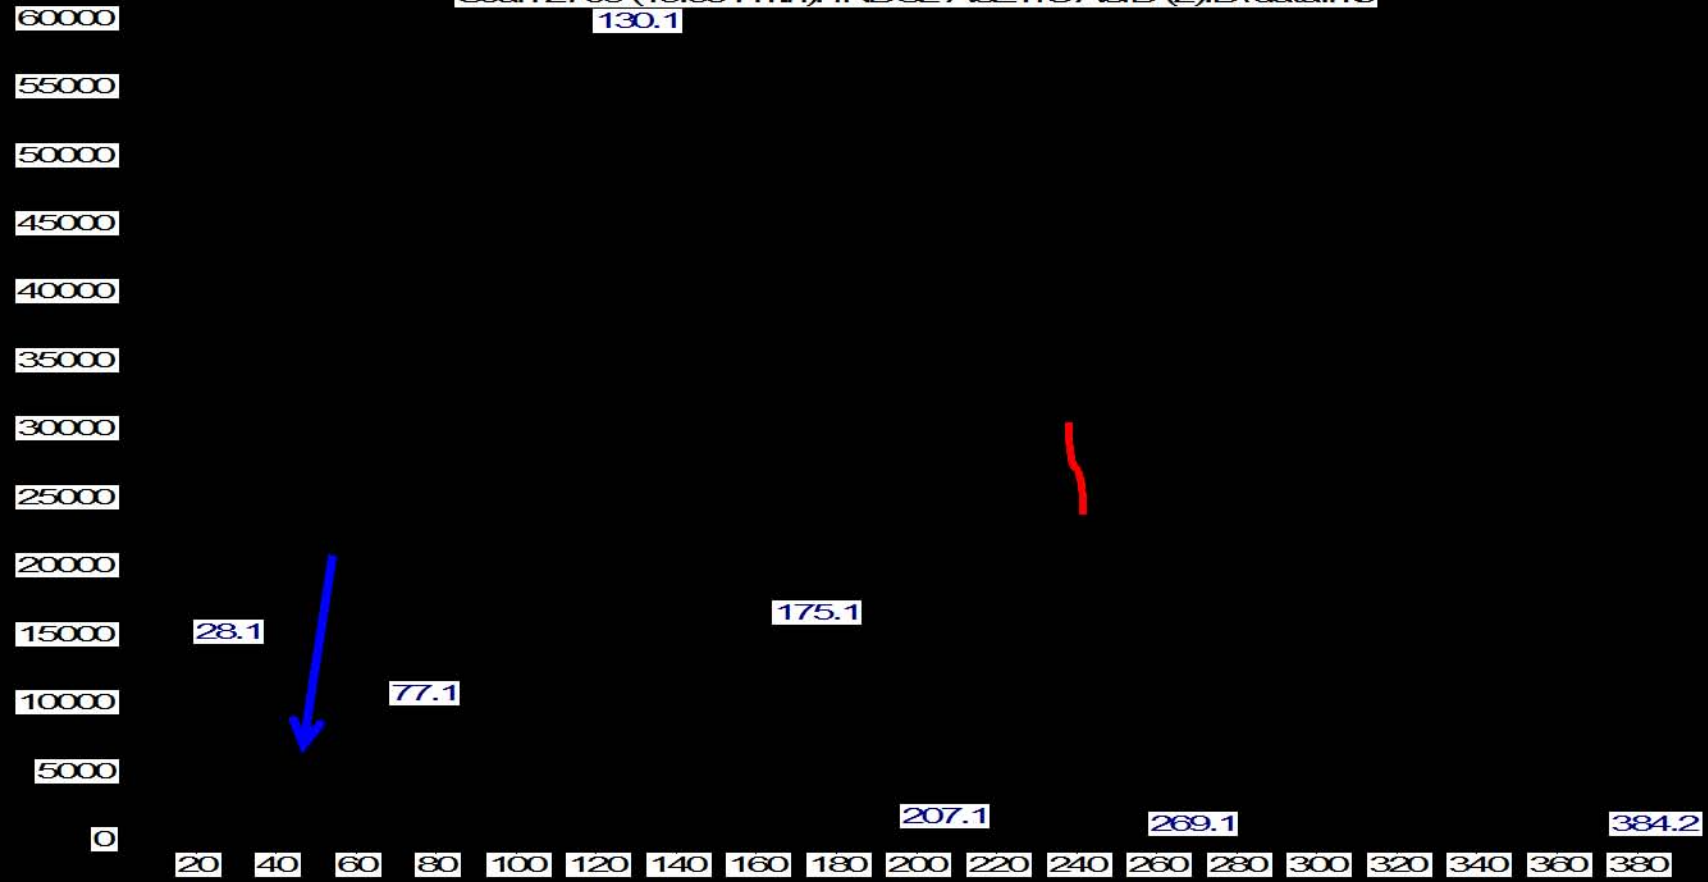

m/z ->

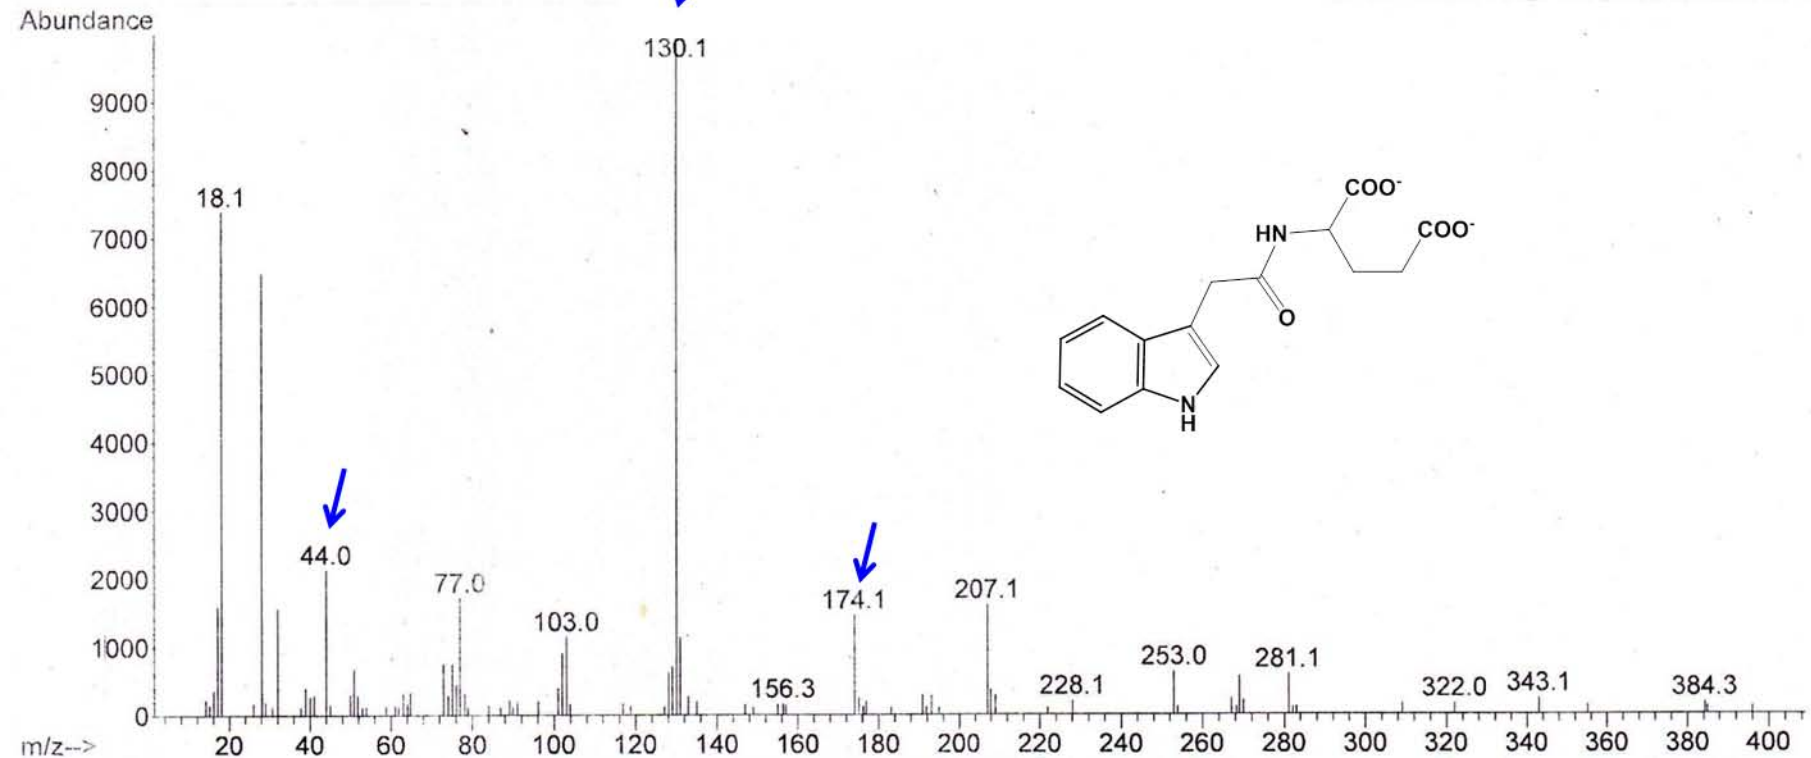

Supplementary figures.

**Figure 1S.** Germination of somatic embryos. A) Cotyledonary somatic embryos. B) Germination of the somatic embryos. From left to right, cotyledonary somatic embryo; development of the plantlets until the stage of six leaves. C) Individual *C. canephora* plantlet from a three-month-old somatic embryo.

**Figure 2S.** Transcript profile of auxin homeostasis-related genes during the process of somatic embryogenesis on *C. canephora*. Total RNA was extracted from foliar tissues from pre-conditioning conditions (-14,-9,-4 and 0 days) and embryogenic conditions (0.02, 0.04, 1, 3, 5, 7, 14 and 21 days), and the gene expression was determined by RT-PCR. A-C represents the transcription of genes involved in the auxin biosynthesis, D-E represents the transcription of genes involved in the auxin conjugation, and F represents the gene expression of the actin constitutive gene. The size of each fragment cloned and sequenced corresponds to the evaluated genes and was verified by electrophoresis in agarose gels at 1.5% and stained with GelRed. MI and MIV represent the molecular markers HyperLadder I (to fragments above a 200 pb) and HyperLadder IV (to fragments less than 200 pb), respectively.

**Figure 3S.** HPLC chromatogram profile for IAA, IBA, NAA and IAA-Glu and IAA-Asp standards. The samples were analyzed as described in Materials and Methods. The retention times are 3.86 min (IAA-Glu), 3.93 min (IAA-Asp), 4.29 min (IAA-Ala), 5.02 min (IAA), 6.12 min (IBA).

**Figure 4S.** HPLC chromatograms for the standardization of the IAA quantification. One hundred mg of *C. canephora* foliar tissue was extracted and analyzed as described in Materials and Methods. A) Chromatogram of the sample without any further addition. B) Chromatogram of a sample processed as in A and added with 1 mg ml<sup>-1</sup> of BHT. C) Chromatogram of a sample processed as in B, but extracted in the presence of IAA.

**Figure 5S.** Gas chromatography–mass spectrometry identification of auxin IAA. The expected quinolinium ion with an m/z of 130, as well as the other expected fragments, were present.

**Figure 6S.** Gas chromatography–mass spectrometry identification of IAA-Glu conjugate. The expected quinolinium ion with an m/z of 130, as well as the others expected fragments, were present.

Supplementary tables.

Table 1S. Primers designed for qPCR and RT-PCR.

| Gene          | Sequences of the primers          |
|---------------|-----------------------------------|
| <i>CcTAA1</i> | F-5'-CGGAACCATCAGAGAGACGGT-3'     |
|               | R-5'-GTCAGATCCACAACGCTCTCC-3'     |
| <i>CcYUC1</i> | F-5'-AGAAGGTTTTGGTGGTGG-3'        |
|               | R-5'-CTTTTGTAACCTGTTGCTAA-3'      |
| <i>CcYUC3</i> | F-5'-GGCCCWTCAGGTCTAGCC-3         |
|               | R-5'-GRGATTTTRTAGTCACMAGCATG-3'   |
| <i>GH3.1</i>  | F-5'-TCCAGAAGATGGTCTTGGCAG-3'     |
|               | R-5'-CGATCACCGTTTTCCATACGC-3'     |
| <i>GH3.6</i>  | F-5'-GCTGGAGGAGATGCCTCTTT-3'      |
|               | R-5'-CATCGAGACCCCATCTCTGC-3'      |
| <i>GH3.17</i> | F-5'-TTGTGCAGCGAGATGCGATA-3'      |
|               | R-5'-TAGGCTGGCGAAACTACAAGC-3'     |
| <i>ACTIN</i>  | F-5'-GGAGAAGAGTTATGAGCTGCCTGAC-3' |
|               | R-5'-CATACGATCAGCAATACCAGGGAA-3'  |
